# Supplementary material for: Generation of blue chrysanthemums by anthocyanin B-ring hydroxylation and glucosylation and its coloration mechanism
Source: PubMed Central journal article supplement — Sci Adv. 2017 Jul 26;3(7):e1602785. doi: 10.1126/sciadv.1602785 (PMC5529055; doi:10.1126/sciadv.1602785), 2017-07-26
Supplement: 1602785_SM.pdf [file 1602785_SM.pdf]

## Supplementary Materials for

### Generation of blue chrysanthemums by anthocyanin B-ring hydroxylation and glucosylation and its coloration mechanism

Naonobu Noda, Satoshi Yoshioka, Sanae Kishimoto, Masayoshi Nakayama, Mitsuru Douzono, Yoshikazu Tanaka, Ryutaro Aida

Published 26 July 2017, *Sci. Adv.* **3**, e1602785 (2017)  
DOI: 10.1126/sciadv.1602785

#### This PDF file includes:

- Supplementary Materials and Methods
- fig. S1. Structures of anthocyanins.
- fig. S2. Schematic representation of binary vectors used for chrysanthemum transformation.
- fig. S3. Anthocyanin profiles of representative ‘Sei Arabella’ transgenic lines.
- fig. S4. Flavonoids and caffeoylquinates profiles of representative ‘Sei Arabella’ transgenic lines.
- fig. S5. LC-MS analysis of copigment extract from a cellulose TLC plate.
- fig. S6. Flavonoids and caffeoylquinates profiles of whole and epidermal petal tissue from a blue transgenic line.
- table S1. Flower color changes due to expression of *CamF3'5'H* and/or *CtA3'5'GT*.
- table S2. Anthocyanin and flavone content and their ratios in petals of ‘Sei Arabella’ and blue/violet-blue-colored transgenic chrysanthemums.
- table S3. Primer sets used in binary vector construction.

## Supplementary Materials and Methods

### 1. Construction of binary vectors for transgene expression.

Independent transgene cassettes were tandemly connected on a T-DNA binary vector by a modification system using eight-base recognition restriction endonuclease sites (31). For the co-expression of multiple transgenes, we constructed two T-DNA binary vectors containing the *CmF3Hp:GUS:NOSt* cassette, pBI121 HANS-CmF3Hp1k-S (6) and pBI121-FASS-CmF3H1k. The eight-base recognition restriction endonuclease sites *AscI*, *NotI* and *SwaI*, upstream of the *CmF3H* promoter of pBI121 HANS-CmF3Hp1k-S were changed to *FseI*, *AscI*, *StuI* and *SwaI* sites in pBI121-FASS-CmF3H1k. The first gene was directly subcloned in place of the *GUS* gene in the binary vectors, and the additional gene cassettes were subcloned into the *AscI/FseI* and *SwaI* sites. The second and third cassettes were constructed in entry vector pMCE5-2 containing the *CmF3Hp:GUS:AtHSPt* (*Arabidopsis* heat shock protein 18.2 gene terminator) (32) cassette. The transgenes were expressed under the control of *NtADH-5'*-UTR as a translational enhancer (33). The transgene was cloned in place of the *GUS* gene in the entry vector, which was then digested with *AscI/PmeI* or *FseI/PmeI* to remove the *CmF3Hp:gene:AtHSPt* cassette for subcloning into the *AscI/SwaI* or *FseI/SwaI* sites of the binary vectors. The primer sets used in vector construction are listed in supplementary table S3.

To obtain entry vector pMCE5, first, we amplified 1047 bp of the *CmF3H* promoter region (GenBank accession number FW570860) with primer set 1 and cloned it into pGEM-T easy (Promega). The resulting plasmid was digested with *HindIII/SpeI*, and *CmF3Hp* was subcloned into the *HindIII/XbaI* sites of pBI221. Next, we amplified *NOSt* with primer set 2 and TA-cloned it into pCR2.1 (Thermo Fisher Scientific). The *SacI/EcoRI*-digested *NOSt* fragment was subcloned into the *SacI/EcoRI* sites of plasmid pBI221 containing *CmF3Hp*, which was then digested with *HindIII* and *EcoRI* to obtain the *CmF3Hp:GUS:NOSt* cassette. The cassette was then subcloned into the *HindIII/EcoRI* sites of pSPORT2, and the resulting

plasmid was named pMCE5. We constructed the pMCE5-2 entry vector as follows. The 5'-restriction enzyme sites of *CmF3Hp* in pMCE5 were changed to *HindIII*, *FseI*, *AscI*, *StuI* and *SwaI*. The *CmF3Hp* fragment was amplified with primer set 3 and subcloned into pCR-BluntII-TOPO (Thermo Fisher Scientific) as pCR-FASS-CmF3Hpro1k. We then subcloned the *HindIII/NheI* *CmF3Hp* digest of pCR-FASS-CmF3Hpro1k into the *HindIII/NheI* sites of pMCE5 as pMCE5-FASS. Next, *AtHSPt* was amplified with primer set 4 and cloned into pCR-BluntII-TOPO. The *AtHSPt*-containing pCR-BluntII-TOPO vector was digested with *SacI/KpnI*, and the resulting *AtHSPt* fragment was subcloned into the *SacI/KpnI* sites of pMCE5-FASS in place of *NOST*. The resulting plasmid (pMCE5-2) contained the *CmF3Hp:GUS:AtHSPt* cassette.

The binary vector pB428 contained cassettes for overexpressing Canterbury bells (*Campanula medium*) *F3'5'H* (*CamF3'5'H*, GenBank accession number FW570877) and butterfly pea (*Clitoria ternatea*) *A3'5'GT* (*CtA3'5'GT*, *UGT78K8*, GenBank accession number AB115560), and an RNAi cassette for down-regulation of *CmF3'H*. We constructed the *CmF3'H* down-regulation cassette as follows. *CmF3'H* was amplified from chrysanthemum 'Arietta' petal cDNA by PCR with primer set 5, and cloned into pCR2.1 (pCR-CmF3'H). The RNAi trigger sequence was amplified from pCR-CmF3'H with primer set 6, and cloned into pENTR-D/TOPO (pENTR-CmF3'H-C). We transferred the RNAi trigger sequence from pENTR-CmF3'H-C to pANDA35K (34) by LR reaction (pANDA-CmF3'H-C IR). The inverted repeat of the *CmF3'H* fragment with *GUS* spacer was removed from pANDA-CmF3'H-C IR by digestion with *XbaI/EcoICRI*, and subcloned into the *SpeI/EcoICRI* sites of pB1121-FASS-CmF3H1k (pB319, pBF3'H-Ci). pCR ADHNF-CamF3'5'H (6) containing *NtADH-5'-UTR*-fused *CamF3'5'H* was digested with *KpnI*, blunt-ended, and then digested with *XbaI*. We ligated the resulting fragment into the *NheI/EcoICRI* digest of pMCE5-2 and named it pMCE5-2 ADHNF-CamF3'5'H. The *CmF3Hp:NtADH-5'UTR:CamF3'5'H:AtHSPt* cassette

was removed from pMCE5-2 ADHNF-CamF3'5'H by digestion with *FseI/PmeI*, and subcloned into the *FseI/SwaI* sites of pB319 (pB332, pBF3'H-Ci:CamF3'5'H).

To create the *NtADH*-5'-UTR-fused *CtA3'5'GT* construct, first, we amplified two primary PCR products from pBCtBGT1DB24 containing *CtA3'5'GT* cDNA by primer set 7, and from pBI221 ADH-221 by primer set 8. A DNA fragment in which the *NtADH*-5'UTR was directly coupled to the start codon of *CtA3'5'GT* was obtained by PCR using two primary amplified DNA fragments as templates and primer set 9. This DNA fragment was cloned into pCR2.1-TA and then digested with *XbaI* and *HindIII*, and the resulting DNA fragment was ligated into *XbaI/HindIII*-digested pBluescriptII SK(+) to obtain a pBSII-ADH-5'-Ct3'5'GT-HindIII plasmid. We cloned the *HindIII/XhoI* insert fragment of pBSII-ADH-5'-Ct3'5'GT-HindIII into the *HindIII/XhoI* site of pBCtBGT1DB24 (pBSII-ADH-CtA3'5'GT). The *NtADH*-5'UTR:*CtA3'5'GT* fragment obtained from pBSII-ADH-CtA3'5'GT by *NheI/EcoICRI* digestion was subcloned into the *NheI/EcoICRI* sites of pMCE5-2 (pMCE5-2 ADHNF-CtA3'5'GT). The *CmF3Hp:NtADH*-5'UTR:*CtA3'5'GT:AtHSPt* cassette was removed from pMCE5-2 ADHNF-CtA3'5'GT with *FseI/PmeI*, and subcloned into the *FseI/SwaI* sites of pB332 (pB428, pBF3'H-Ci:CamF3'5'H:CtA3'5'GT, fig. S2B). The sequence of the *CmF3'H* RNAi cassette has been registered in DDBJ/ENA/GenBank under accession code LC222468.

We constructed the binary vector pB423 for co-expression of *CamF3'5'H* and *CtA3'5'GT* as follows. The *NtADH*-5'UTR fused to *CtA3'5'GT* was amplified from pBSII-ADH-CtA3'5'GT with primer set 10, and ligated into pCR-BluntII-TOPO (Thermo Fisher Scientific). The *NtADH*-5'UTR-*CtA3'5'GT* DNA fragment from the *NheI/EcoICRI* digest was cloned into pBI121 HANS-CmF3Hp1k-S (pB249, fig.S2B). The *CmF3Hp:NtADH*-5'UTR:*CamF3'5'H:AtHSPt* cassette from the *AscI/PmeI* digest of pMCE5-2 ADHNF-CamF3'5'H was subcloned into the *AscI/SwaI* sites of pB249 (pB423, CtA3'5'GT:CamF3'5'H;

fig. S2, A and B). We registered the sequence of the *CtA3* 5' *GT* and *CamF3* 5' *H* cassettes in DDBJ/ENA/GenBank under accession code LC222467.

## 2. Compound characterization data.

A3: cyanidin 3-*O*-(6''-*O*-malonyl)glucoside-3'-*O*-glucoside; <sup>1</sup>H NMR (600 MHz, DMSO-*d*<sub>6</sub>-TFA): δ 8.86 (*s*, 1H), 8.39 (*d*, *J* = 9.0 Hz, 1H), 8.19 (*br s*, 1H), 7.03 (*d*, *J* = 8.3 Hz, 1H), 6.96 (*s*, 1H), 6.70 (*s*, 1H), 5.24 (*d*, *J* = 7.2 Hz, 1H), 4.95 (*d*, *J* = 7.2 Hz, 1H), 4.44 (*d*, *J* = 12.0, 1H), 4.11 (*dd*, *J* = 11.7 Hz, 7.5 Hz, 1H), 3.81 (*d*, *J* = 11.4 Hz, 1H), 3.73 (*t*, *J* = 8.4 Hz, 1H), 3.59 (*dd*, *J* = 2.7, 11.4 Hz, 1H), 3.49 (*t*, *J* = 8.4 Hz, 3H), 3.37–3.43 (*m*, 5H), 3.25 (*t*, *J* = 8.7 Hz, 2H); HRMS (*m/z*): [M]<sup>+</sup> calcd. for C<sub>30</sub>H<sub>33</sub>O<sub>19</sub>, 697.1616037; found 697.1605, [M-H+Na]<sup>+</sup> calcd. for C<sub>30</sub>H<sub>32</sub>O<sub>19</sub>Na, 719.1435487; found 719.1781.

A8: delphinidin 3-*O*-(6''-*O*-malonyl)glucoside-3',5'-*O*-diglucoside (ternatin C5) (17); <sup>1</sup>H NMR (600 MHz, CD<sub>3</sub>OD-TFA): δ 9.00 (*s*, 1H), 8.23 (*s*, 1H), 7.03 (*br s*, 1H), 6.86 (*br s*, 1H), 5.25 (*d*, *J* = 7.2 Hz, 1H), 5.08 (*d*, *J* = 6.0 Hz, 2H), 4.53 (*br d*, *J* = 11.4 Hz, 1H), 4.29 (*dd*, *J* = 7.5, 11.7 Hz), 3.96 (*d*, *J* = 12.0 Hz, 2H), 3.91 (*m*, 1H), 3.78 (*dd*, *J* = 5.7, 12.3 Hz, 2H), 3.72 (*t*, *J* = 7.8 Hz, 2H), 3.56–3.63 (*m*, 6H), 3.54 (*t*, *J* = 9.3 Hz, 1H), 3.46 (*t*, *J* = 9.3 Hz, 2H); HRMS (*m/z*): [M]<sup>+</sup> calcd. for C<sub>36</sub>H<sub>43</sub>O<sub>25</sub>, 875.2093417; found 875.2628, [M-H+Na]<sup>+</sup> calcd. for C<sub>36</sub>H<sub>42</sub>O<sub>25</sub>Na, 897.1912867; found 897.1888.

C1: luteolin 7-*O*-(6''-*O*-malonyl)glucoside (21, 22); <sup>1</sup>H-NMR (600 MHz, DMSO-*d*<sub>6</sub>): δ 6.71 (*s*, 1H, H-3 of aglycone), 6.43(*d*, *J* = 1.4, 1H, H-6), 6.75 (*d*, *J* = 1.4 Hz, 1H, H-8), 7.43 (*s*, 1H, H-2'), 6.89 (*d*, *J* = 8.4 Hz, 1H, H-5'), 7.43 (*d*, *J* = 8.4 Hz, 1H, H-6'), 5.10 (*d*, *J* = 7.6 Hz, 1H, H-1'' of glucosyl), 3.28 (*m*, 1H, H-2''), 3.31 (*m*, 1H, H-3''), 3.19 (*t*, *J* = 9.3 Hz, 1H, H-4''), 3.74 (*t*, *J* = 7.8 Hz, 1H, H-5''), 4.37 (*d*, *J* = 11.0 Hz, 1H, H-6''-a), 4.13 (*dd*, *J* = 11.7 Hz, 6.7 Hz, 1H, H-6''-b), 3.32 (*d*, *J* = 15.6 Hz, 1H, H-2'''-a of malonyl), 3.38 (*d*, *J* = 15.6 Hz, 1H, H-2'''-b); <sup>13</sup>C-NMR (150 MHz, DMSO-*d*<sub>6</sub>): δ 164.8 (C-2 of aglycone), 103.4 (C-3), 182.2 (C-4), 161.4 (C-5), 99.8 (C-6), 162.9 (C-7), 94.9 (C-8), 157.2 (C-9), 105.7 (C-10), 121.7 (C-10.4 (aglycone), 113.8 (C-2'), 146.1 (C-3'), 150.2 (C-4'), 116.2 (C-5'), 119.3 (C-6'), 99.9 (C-1'' of

glucosyl), 73.3 (C-2''), 76.4 (C-3''), 69.8 (C-4''), 74.1 (C-5''), 64.3 (C-6''), 167.1 (C-1''' of malonyl), 168.0 (C-3'''), 41.7 (C-2'''); HRMS ( $m/z$ ):  $[M+H]^+$  calcd. for  $C_{24}H_{23}O_{14}$ , 535.1087803; found 535.1046,  $[M+Na]^+$  calcd. for  $C_{24}H_{22}O_{14}Na$ , 557.0907253; found 557.1089.

C2: tricetin 7-*O*-(6''-*O*-malonyl)glucoside;  $^1H$ -NMR (600 MHz, DMSO- $d_6$ ):  $\delta$  6.59 (*s*, 1H, H-3 of aglycone), 6.44 (*d*,  $J = 2.1$ , 1H, H-6), 6.70 (*d*,  $J = 2.1$  Hz, 1H, H-8), 6.98 (*s*, 2H, H-2' & 6' of aglycone), 5.10 (*d*,  $J = 7.6$  Hz, 1H, H-1'' of glucosyl), 3.28 (*t*,  $J = 8.1$  Hz, 1H, H-2''), 3.33 (*t*,  $J = 8.7$  Hz, 1H, H-3''), 3.20 (*t*,  $J = 9.0$  Hz, 1H, H-4''), 3.74 (*dif.t*,  $J = 9.3$  Hz, 1H, H-5''), 4.33 (*d*,  $J = 10.3$  Hz, 1H, H-6''-a), 4.17 (*dd*,  $J = 12.1$  Hz, 6.5 Hz, 1H, H-6''-b), 3.34 (*d*,  $J = 15.6$  Hz, 1H, H-2'''-a of malonyl), 3.39 (*d*,  $J = 15.6$  Hz, 1H, H-2'''-b);  $^{13}C$ -NMR (150 MHz, DMSO- $d_6$ ):  $\delta$  165.0 (C-2 of aglycone), 103.5 (C-3), 182.1 (C-4), 161.5 (C-5), 99.8 (C-6), 162.9 (C-7), 95.0 (C-8), 157.2 (C-9), 105.7 (C-10), 120.6 (C-1' of aglycone), 106.2 (C-2'), 146.6 (C-3'), 138.3 (C-4'), 146.6 (C-5'), 106.2 (C-6'), 99.7 (C-1'' of glucosyl), 73.3 (C-2''), 76.4 (C-3''), 69.8 (C-4''), 74.0 (C-5''), 64.3 (C-6''), 167.1 (C-1''' of malonyl), 168.1 (C-3'''), 41.6 (C-2'''); HRMS ( $m/z$ ):  $[M+H]^+$  calcd. for  $C_{24}H_{23}O_{15}$ , 551.1036949; found 551.1034.  $[M+Na]^+$  calcd. for  $C_{24}H_{22}O_{15}Na$ , 573.0856399; found 573.0919.

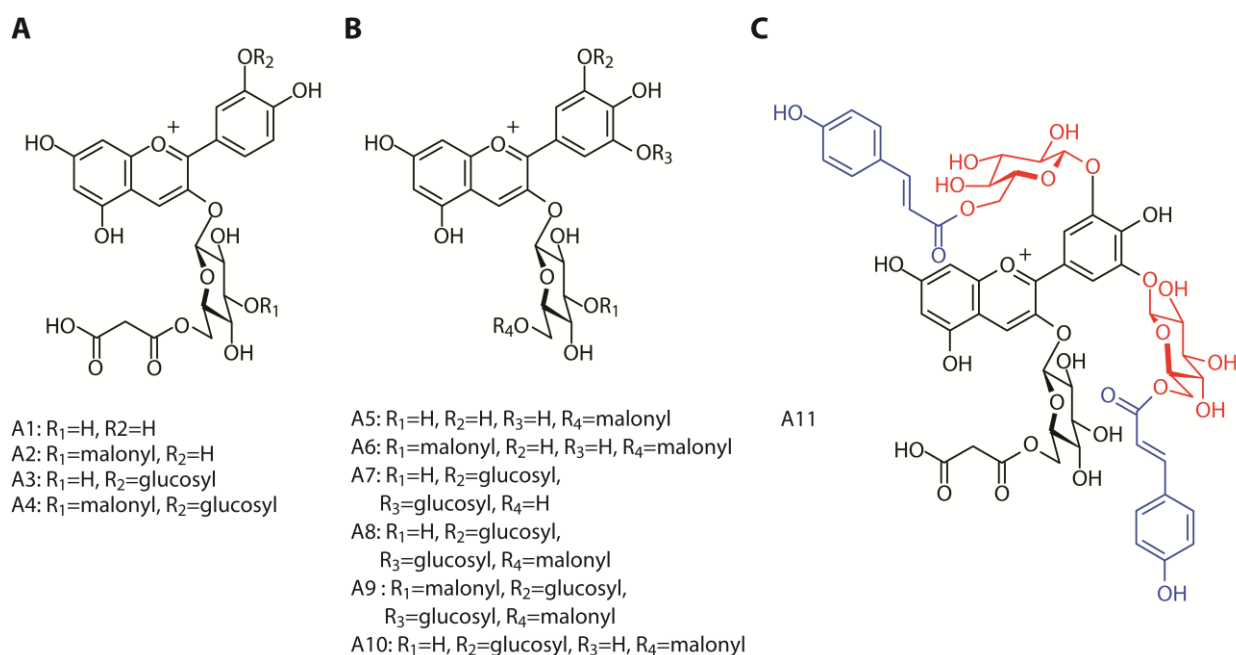

**fig. S1. Structures of anthocyanins. (A)** Cyanidin-based anthocyanins. **(B)**

Delphinidin-based anthocyanins. The A3 and A8 structures were determined by <sup>1</sup>H-NMR and NOESY spectra. The NOESY spectra of A3 and A8 indicated that glucose was connected at aglycon-3-OH, 3'-OH, and/or 5'-OH through a glycosyl bond. The structures of A1–A2, A4–A7 and A9–A10 were putatively identified by LC-MS/MS spectra as follows: A1, cyanidin 3-(6''-malonyl)glucoside; A2, cyanidin 3-(3'',6''-dimalonyl)glucoside; A3, cyanidin 3-(6''-malonyl)glucoside-3'-glucoside; A4, cyanidin 3-(3'',6''-dimalonyl)glucoside-3'-glucoside; A5, delphinidin 3-(6''-malonyl)glucoside; A6, delphinidin 3-(3'',6''-dimalonyl)glucoside; A7, delphinidin 3,3',5'-triglucoside (preternatin C5); A8, delphinidin 3-(6''-malonyl)glucoside-3',5'-diglucoside (ternatin C5); A9, delphinidin 3-(3'',6''-dimalonyl)glucoside-3',5'-diglucoside; A10, delphinidin 3-(6''-malonyl)glucoside-3'-glucoside. **(C)** A11, delphinidin 3-(6''-malonyl)glucoside-3',5'-di-(6''',6''''-p-coumaroyl)glucoside (ternatin D3).

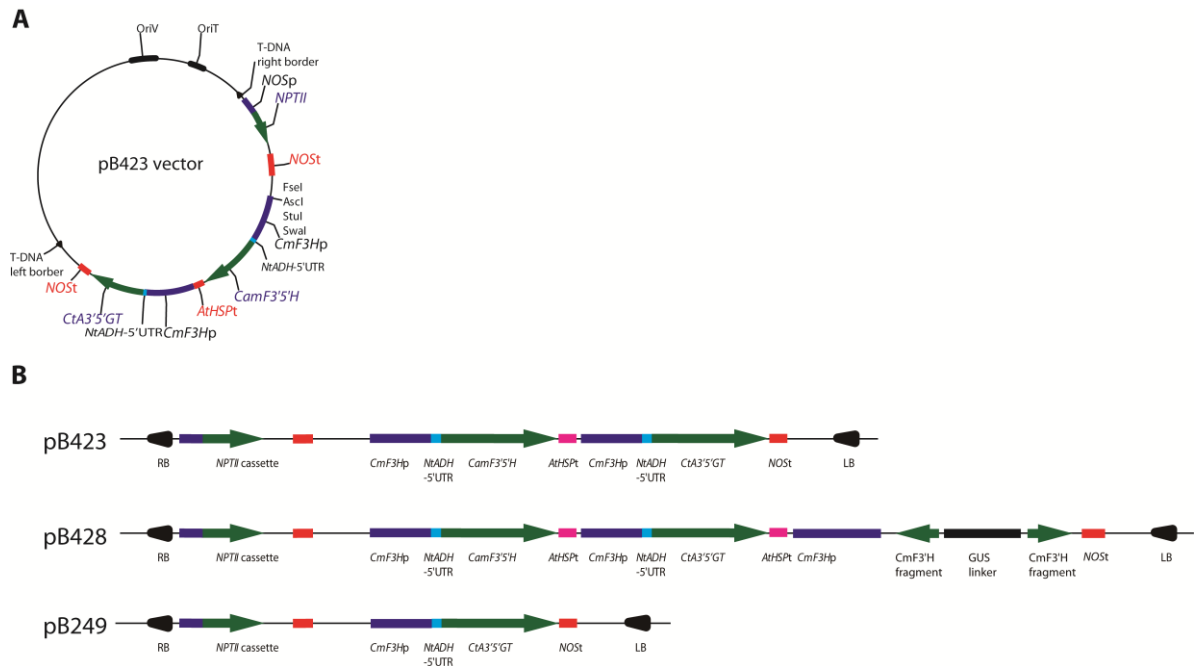

**fig. S2. Schematic representation of binary vectors used for chrysanthemum transformation.** (A) pB423 vector contains *CamF3'5'H* and *CtA3'5'GT* expression cassettes in pBI121. (B) T-DNA components of pB423, pB428, and pB249 vectors. RB, right border; *NPTII*, neomycin phosphotransferase II gene; *CmF3Hp*, chrysanthemum flavanone 3-hydroxylase gene promoter; *NtADH-5'UTR*, tobacco alcohol dehydrogenase gene-5'UTR; *CamF3'5'H*, *Campanula* flavonoid 3',5'-hydroxylase gene; *AthHSPt*, *Arabidopsis* heat shock protein 18.2 gene terminator; *NOST*, agrobacterium nopaline synthase gene terminator; *CtA3'5'GT*, butterfly pea UDP-glucose:anthocyanin 3',5'-*O*-glucosyltransferase gene; *CmF3H*, chrysanthemum flavonoid 3'-hydroxylase gene; GUS,  $\beta$ -glucuronidase gene; LB, left border.



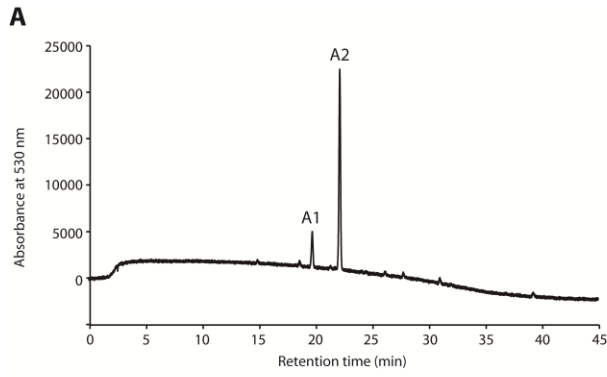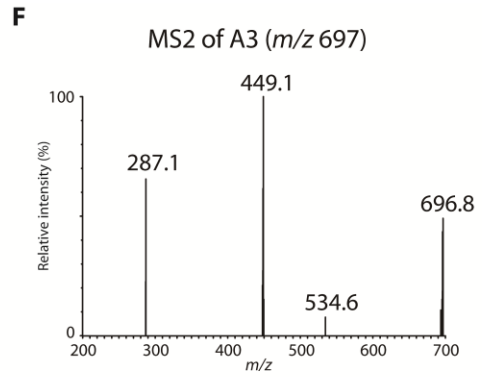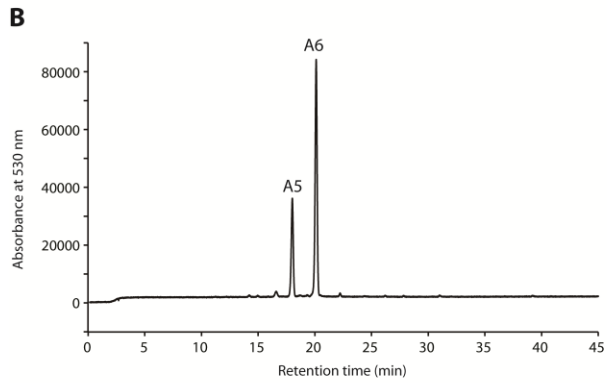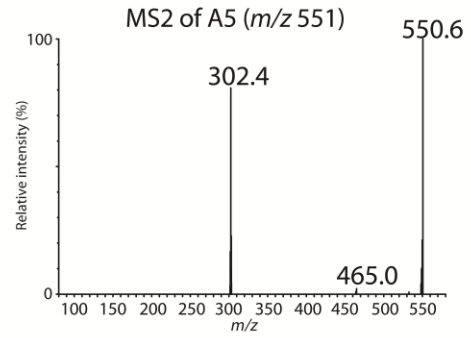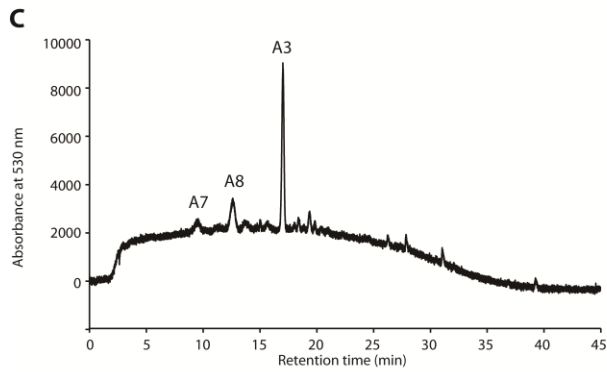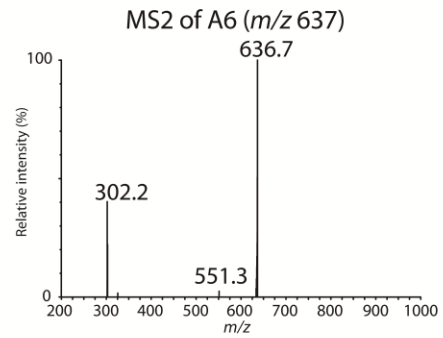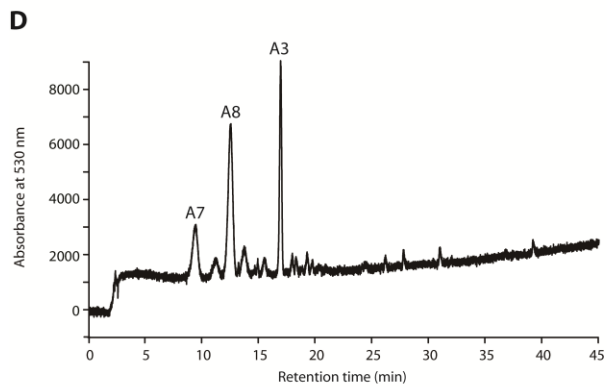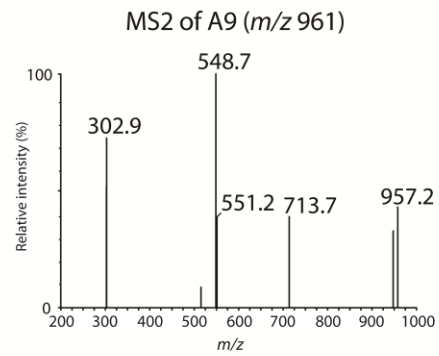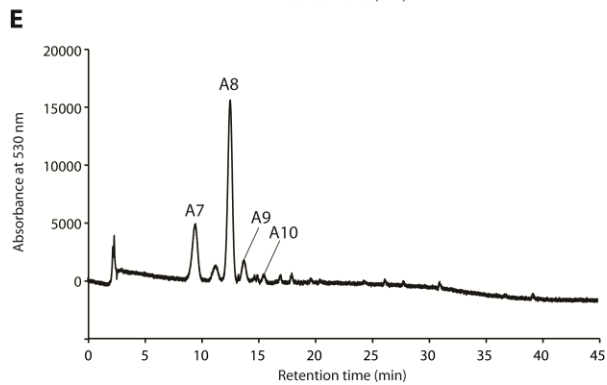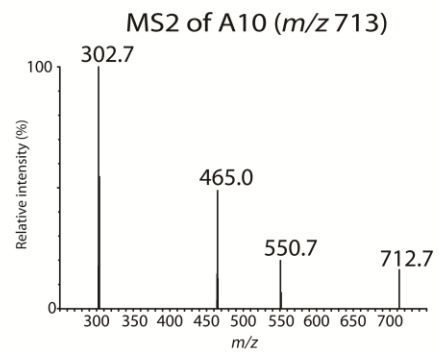

**fig. S3. Anthocyanin profiles of representative ‘Sei Arabella’ transgenic lines. (A-E) HPLC chromatograms monitored at 530 nm. For structures A1-A10, see fig. S1. (A) ‘Sei Arabella’ wild type with pink flowers mainly accumulated A1 and A2. (B) Transgenic 1916-10 line with purple-violet flowers, in which only *CamF3'5'H* was expressed, mainly accumulated A5 and A6. (C) Transgenic 1916-25 line with pale purple flowers, in which only *CtA3'5'GT* was expressed, mainly accumulated A3. (D) Transgenic 1916-12 line with violet-blue flowers, in which *CamF3'5'H* and *CtA3'5'GT* were expressed, mainly accumulated A7 and A8 with a small amount of A3. (E) Transgenic 1916-23 line with blue flowers, in which *CamF3'5'H* and *CtA3'5'GT* were expressed, mainly accumulated A7 and A8. (F) MS/MS (MS2) fragmentation spectra of these major anthocyanins. Structures of A1-A10 anthocyanins (precursor ion  $[M]^+$ ): A1, cyanidin 3-(6''-malonyl)glucoside; A2, cyanidin 3-(3'',6''-dimalonyl)glucoside; A3, cyanidin 3-(6''-malonyl)glucoside-3'-glucoside ( $m/z$  697), A5, delphinidin 3-(6''-malonyl)glucoside ( $m/z$  551); A6, delphinidin 3-(3'',6''-dimalonyl)glucoside ( $m/z$  637); A7, delphinidin 3,3',5'-triglucoside (preternatin C5)( $m/z$  789); A8, delphinidin 3-(6''-malonyl)glucoside-3',5'-diglucoside (ternatin C5) ( $m/z$  875); A9, delphinidin 3-(3'',6''-dimalonyl)glucoside-3',5'-diglucoside ( $m/z$  961); A10, delphinidin 3-(6''-malonyl)glucoside-3'-glucoside ( $m/z$  713).**

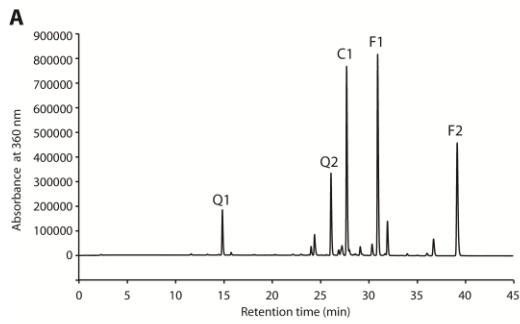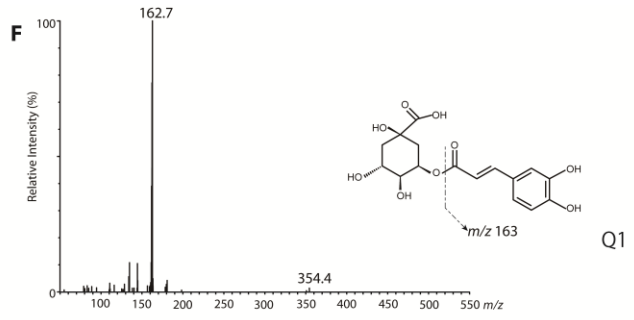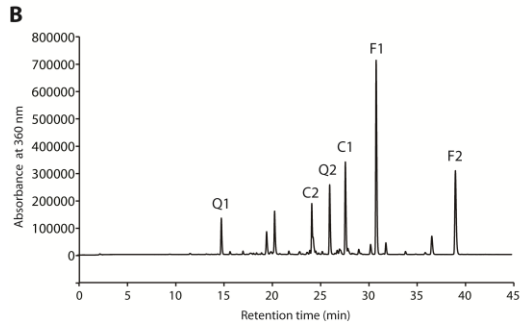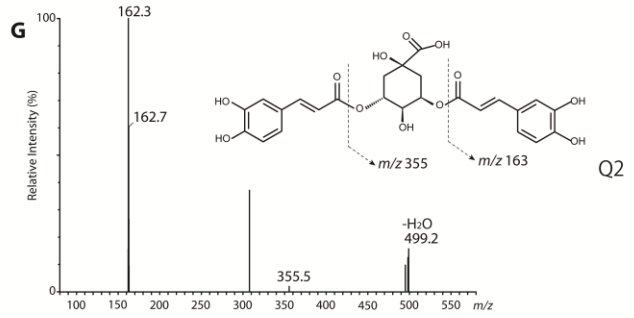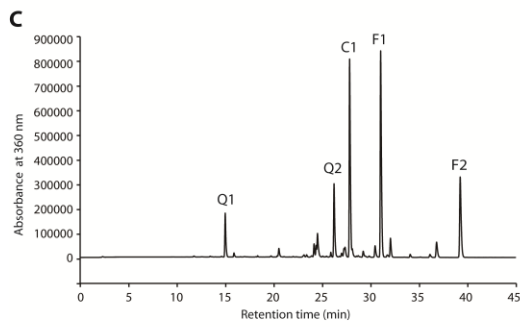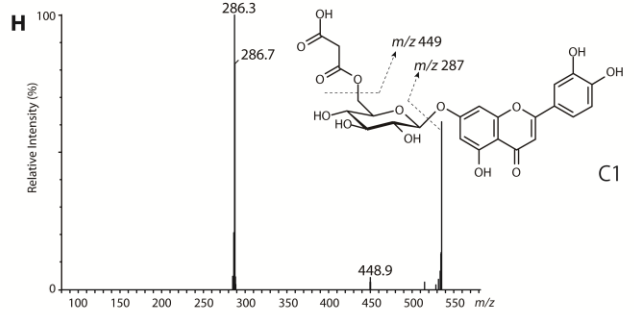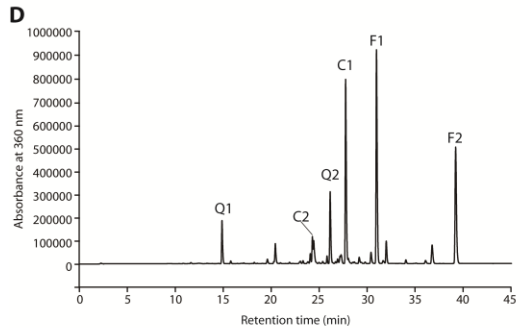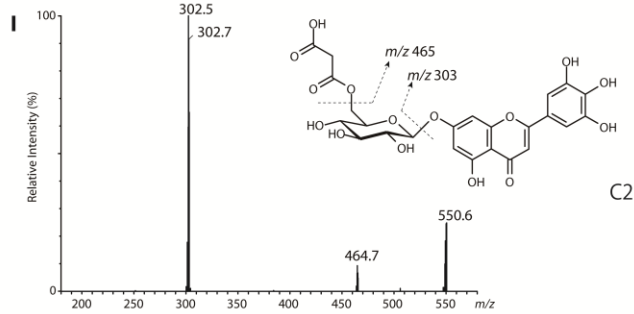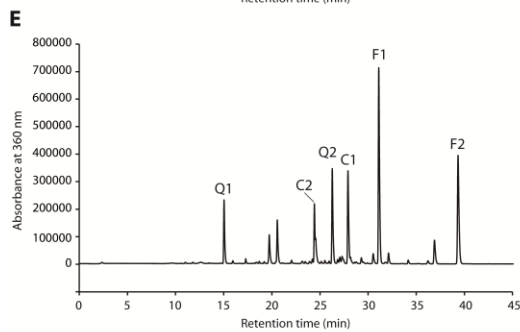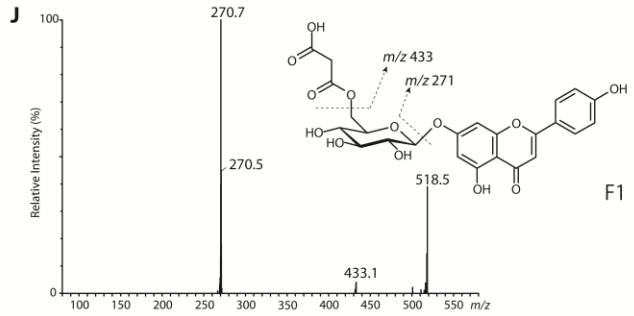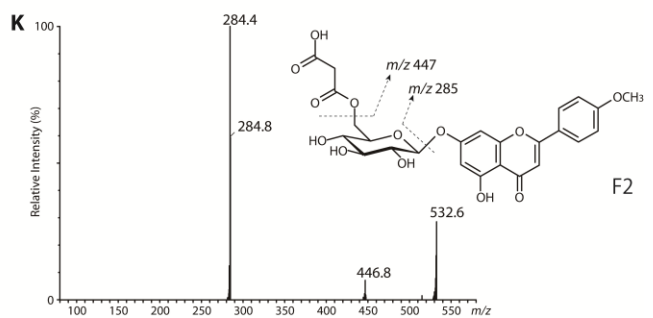

**fig. S4. Flavonoids and caffeoylquinates profiles of representative ‘Sei Arabella’ transgenic lines.** (A–E) HPLC chromatograms monitored at 360 nm. (A, C) Wild type and transgenic 1916-25 line accumulating cyanidin-based anthocyanins have almost same chromatogram. (B, D, E) Transgenic 1916-10, 12, 23 lines accumulating delphinidin-base anthocyanins contained C2 flavone and some unknown compounds. (F–K) ESI-MS/MS fragmentation of main peaks. Structures of Q1–Q2, C1–C2 and F1–F2 (precursor ion  $[M]^+$ ): Q1, 3-caffeoylquinic acid ( $m/z$  355); Q2, 3,5-dicaffeoylquinic acid ( $m/z$  517); C1, luteolin 7-(6''-malonyl)glucoside ( $m/z$  535); C2, tricetin 7-(6-malonyl)glucoside ( $m/z$  551); F1, apigenin 7-(6''-malonyl)glucoside ( $m/z$  519); F2, acacetin 7-(6''-malonyl)glucoside ( $m/z$  533).

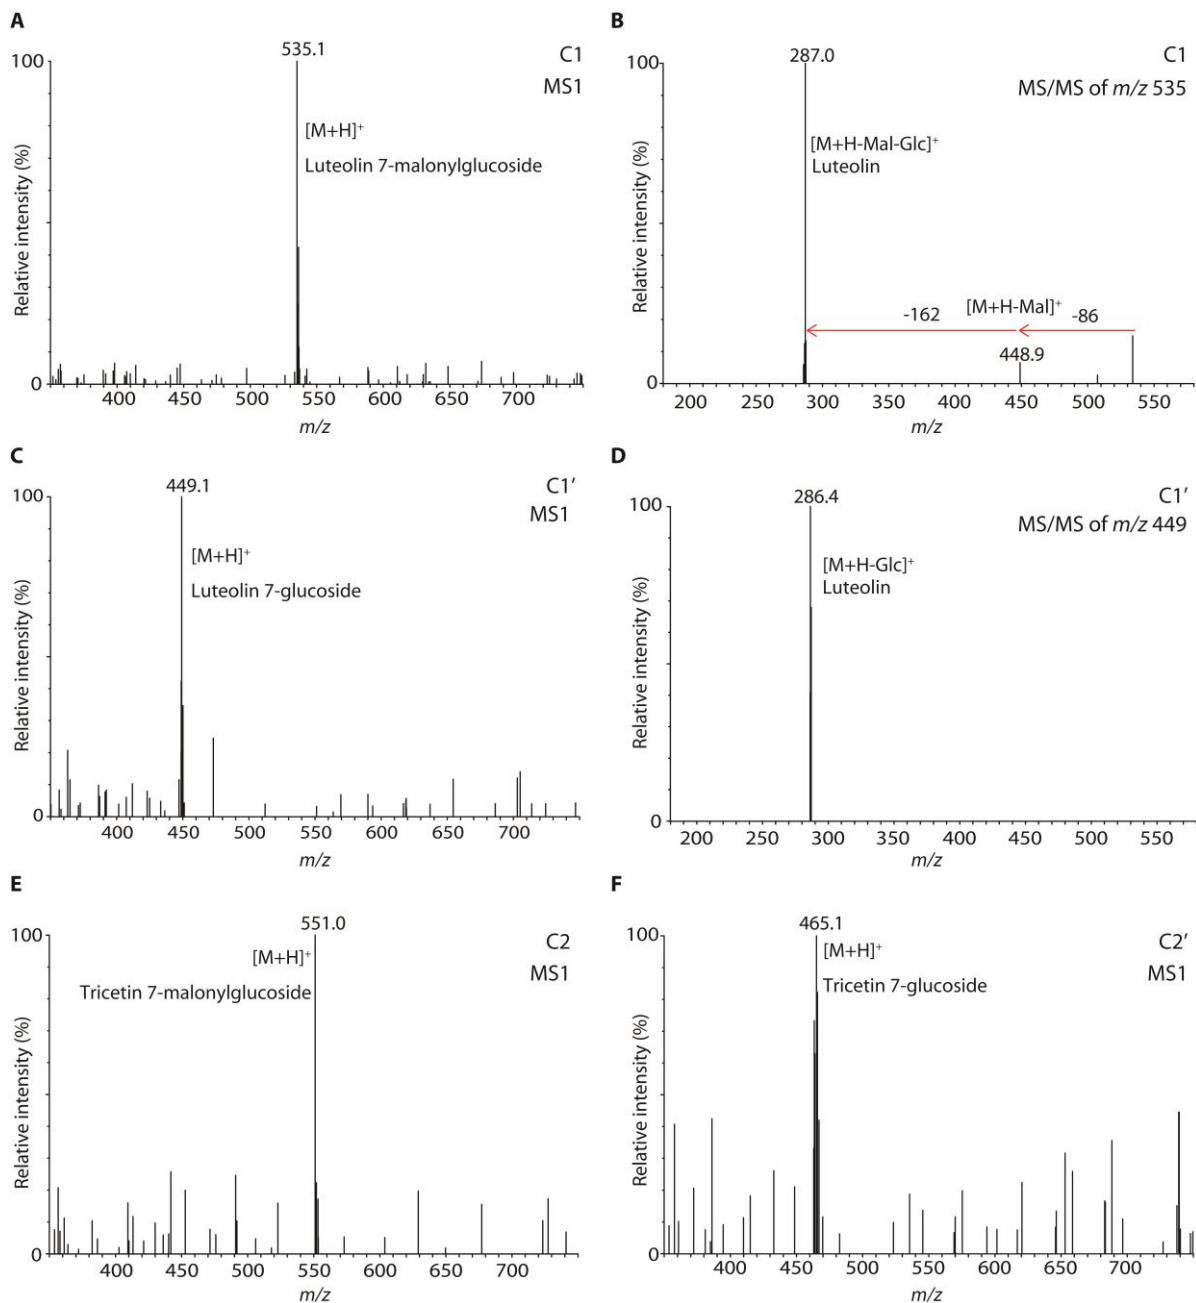

**fig. S5. LC-MS analysis of copigment extract from a cellulose TLC plate.** (A) MS spectrum of C1 in extract from band X. (B) MS/MS fragmentation spectrum of C1 ( $m/z$  535). (C) MS spectrum of C1' in extract from band X. (D) MS/MS fragmentation spectrum of C1' ( $m/z$  449). (E) MS spectrum of C2 in extract from band Y. (F) MS spectrum of C2' in extract from band Y. Compound C1' and C2' were predicted to be the demalonylated degradation product of C1 and C2, respectively. C1', luteolin 7-glucoside; C2', tricetin 7-glucoside; C1, luteolin 7-malonylglucoside; C2, tricetin 7-malonylglucoside. Glc, glucosyl, Mal, malonyl.

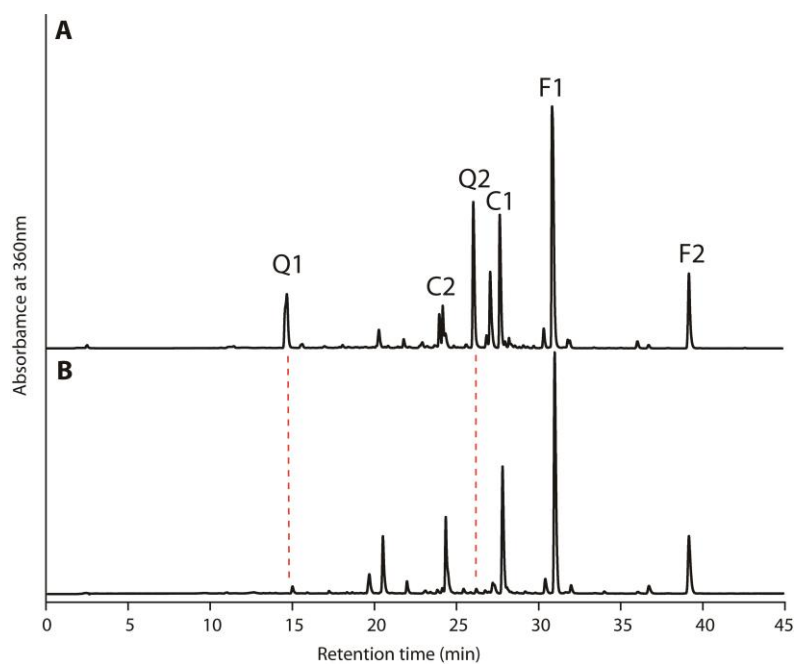

**fig. S6. Flavonoids and caffeoylquinates profiles of whole and epidermal petal tissue from a blue transgenic line.** HPLC chromatograms monitored at 360 nm. For structures, see fig.S4. **(A)** Whole petal extract. **(B)** Adaxial epidermal tissues extract. The epidermal tissues were obtained by using tweezers. Caffeoylquinates Q1 and Q2 were trace levels in epidermal tissues containing anthocyanins. Q1, 3-caffeoylquinic acid; Q2, 3,5-dicaffeoylquinic acid; C1, luteolin 7-malonylglucoside; C2, tricetin 7-malonylglucoside; F1, apigenin 7-malonylglucoside; F2, acacetin 7-malonylglucoside.

**table S1. Flower color changes due to expression of *CamF3'5'H* and/or *CtA3'5'GT*.**

| Host            | Plasmid | Tansgene cassettes<br>(RB to LB direction of<br>T-DNA) | Transgeni<br>c line<br>name | No. of<br>transgenic<br>lines | No. of<br>purple/viole<br>t/blue<br>transgenic<br>lines | (%)   | No. of transgenic<br>lines with blue<br>flowers of RHSCC<br>Blue/Violet-Blue<br>group | (%)   |
|-----------------|---------|--------------------------------------------------------|-----------------------------|-------------------------------|---------------------------------------------------------|-------|---------------------------------------------------------------------------------------|-------|
|                 |         | For 3',5'-hydroxylation<br>and glucosylation*          |                             |                               |                                                         |       |                                                                                       |       |
| Taihei          | pB423   | CtA3'5'GT : CamF3'5'H                                  | 1728                        | 32                            | 21                                                      | (66)  | 19                                                                                    | (59)  |
| Sei<br>Arabella | pB423   | CtA3'5'GT : CamF3'5'H                                  | 1916                        | 26                            | 21                                                      | (81)  | 16                                                                                    | (62)  |
| T37             | pB423   | CtA3'5'GT : CamF3'5'H                                  | 1921,<br>1939               | 10                            | 10                                                      | (100) | 9                                                                                     | (90)  |
| Sei<br>Arabella | pB428   | CmF3'H-RNAi :<br>CamF3'5'H : CtA3'5'GT                 | 1804                        | 3                             | 3                                                       | (100) | 2                                                                                     | (67)  |
| T27             | pB428   | CmF3'H-RNAi :<br>CamF3'5'H : CtA3'5'GT                 | 1805,<br>1872               | 10                            | 8                                                       | (80)  | 4                                                                                     | (40)  |
| Sei Shawl       | pB428   | CmF3'H-RNAi :<br>CamF3'5'H : CtA3'5'GT                 | 1870,<br>1891               | 10                            | 6                                                       | (60)  | 3                                                                                     | (30)  |
| T57             | pB428   | CmF3'H-RNAi :<br>CamF3'5'H : CtA3'5'GT                 | 1890                        | 1                             | 1                                                       | (100) | 1                                                                                     | (100) |
|                 |         | For 3'-glucosylation                                   |                             |                               |                                                         |       |                                                                                       |       |
| 940-0765        | pB249   | CtA3'5'GT                                              | 1356                        | 25                            | 0                                                       | (0)   | 0                                                                                     | (0)   |
| Taihei          | pB249   | CtA3'5'GT                                              | 1979                        | 25                            | 0                                                       | (0)   | 0                                                                                     | (0)   |

\*The chrysanthemum *F3H* promoter (*CmF3Hp*) was used for all gene cassettes. The *NOS* terminator (*NOS*t) from *Agrobacterium tumefaciens* was used for the first gene cassette, and *Arabidopsis HSP* terminator (*AtHSP*t) was used for subsequent cassettes.

Abbreviations: *Ct*, *Clitoria ternatea*; *Cam*, *Campanula medium*; *Cm*, *Chrysanthemum morifolium*; A3'5'GT, UDP-glucose:anthocyanin 3',5'-*O*-glucosyltransferase; F3'5'H, flavonoid 3',5'-hydroxylase; F3'H, flavonoid 3'-hydroxylase; RB, right T-DNA border; LB, left T-DNA border; RHSCC, Royal Horticultural Society Colour Charts.

**table S2. Anthocyanin and flavone content and their ratios in petals of ‘Sei Arabella’ and blue/violet-blue–colored transgenic chrysanthemums.**

| Line    | RHS colour charts |        | Anthocyanin contents (nmol/mg)* |      |                        |      |      |                       |      |      |      | Total anthocyanin content (nmol/mg) | Flavone contents (nmol/mg)† |      |      |      | Total flavone content (nmol/mg) | Total flavone /Total anthocyanin | C1 /A7-A9 | C2 /A7-9 |
|---------|-------------------|--------|---------------------------------|------|------------------------|------|------|-----------------------|------|------|------|-------------------------------------|-----------------------------|------|------|------|---------------------------------|----------------------------------|-----------|----------|
|         |                   |        | Cyanidin type                   |      |                        |      |      | Delphinidin type      |      |      |      |                                     |                             |      |      |      |                                 |                                  |           |          |
|         |                   |        | A1                              | A2   | B-ring glucosyl l-type |      | A5   | B-ring glucosyl -type |      |      |      |                                     |                             |      |      |      |                                 |                                  |           |          |
|         |                   |        |                                 |      | A3                     | A4   |      | A7                    | A8   | A9   | A10  |                                     |                             |      |      |      |                                 |                                  |           |          |
| C1      | C2                | F1     | F2                              |      |                        |      |      |                       |      |      |      |                                     |                             |      |      |      |                                 |                                  |           |          |
| WT      | Red-Purple        | 73A-B  | 0.16                            | 0.84 | -                      | -    | -    | -                     | -    | -    | -    | 1.00                                | 2.53                        | -    | 2.87 | 1.97 | 7.37                            | 7.4                              | -         | -        |
| 1916-01 | Violet-Blue       | 97A    | -                               | -    | 0.10                   | -    | 0.05 | 0.24                  | 0.62 | 0.11 | 0.06 | 1.19                                | 1.57                        | 0.58 | 2.52 | 1.90 | 6.56                            | 5.5                              | 1.6       | 0.6      |
| 1916-02 | Violet-Blue       | 97A    | -                               | -    | -                      | -    | -    | 0.40                  | 1.12 | 0.13 | -    | 1.65                                | 0.86                        | 0.54 | 1.78 | 1.07 | 4.25                            | 2.6                              | 0.5       | 0.3      |
| 1916-04 | Violet-Blue       | 95C    | -                               | -    | -                      | -    | 0.06 | 0.56                  | 1.85 | 0.21 | 0.07 | 2.75                                | 1.34                        | 0.77 | 2.93 | 1.14 | 6.17                            | 2.2                              | 0.5       | 0.3      |
| 1916-05 | Violet-Blue       | 92B    | 0.06                            | 0.06 | 0.29                   | 0.07 | 0.07 | 0.21                  | 0.49 | 0.11 | 0.09 | 1.44                                | 2.62                        | 0.20 | 3.06 | 1.51 | 7.39                            | 5.1                              | 3.3       | 0.3      |
| 1916-06 | Violet-Blue       | 92B-C  | -                               | -    | 0.38                   | -    | -    | 0.19                  | 0.49 | 0.09 | -    | 1.15                                | 2.64                        | 0.25 | 3.48 | 1.92 | 8.30                            | 7.2                              | 3.4       | 0.3      |
| 1916-12 | Violet-Blue       | 94B    | -                               | -    | 0.41                   | -    | -    | 0.28                  | 0.68 | 0.11 | 0.05 | 1.53                                | 2.75                        | 0.30 | 3.36 | 2.23 | 8.64                            | 5.6                              | 2.6       | 0.3      |
| 1916-14 | Blue              | 100D   | -                               | -    | -                      | -    | -    | 0.21                  | 0.57 | 0.08 | -    | 0.87                                | 0.64                        | 0.52 | 1.26 | 0.99 | 3.42                            | 3.9                              | 0.7       | 0.6      |
| 1916-15 | Violet-Blue       | 97A-B  | -                               | -    | 0.16                   | -    | 0.07 | 0.34                  | 0.86 | 0.14 | 0.09 | 1.65                                | 2.11                        | 0.46 | 3.56 | 1.94 | 8.07                            | 4.9                              | 1.6       | 0.3      |
| 1916-17 | Violet-Blue       | 96D    | -                               | -    | -                      | -    | -    | 0.43                  | 1.14 | 0.12 | -    | 1.69                                | 1.06                        | 0.47 | 2.28 | 1.03 | 4.84                            | 2.9                              | 0.6       | 0.3      |
| 1916-19 | Violet-Blue       | 95C    | -                               | -    | 0.00                   | -    | 0.08 | 0.33                  | 0.78 | 0.13 | 0.09 | 1.42                                | 0.82                        | 0.54 | 1.72 | 0.76 | 3.85                            | 2.7                              | 0.7       | 0.4      |
| 1916-20 | Violet-Blue       | 95C-D  | -                               | -    | 0.08                   | -    | -    | 0.23                  | 0.60 | 0.08 | -    | 1.00                                | 1.76                        | 0.30 | 3.36 | 1.45 | 6.87                            | 6.9                              | 1.9       | 0.3      |
| 1916-22 | Violet-Blue       | 95C-D  | -                               | -    | -                      | -    | 0.08 | 0.30                  | 0.12 | 0.16 | 0.11 | 0.76                                | 1.39                        | 0.54 | 3.43 | 1.60 | 6.97                            | 9.2                              | 2.4       | 0.9      |
| 1916-23 | Blue              | 100B-C | -                               | -    | -                      | -    | -    | 0.53                  | 1.46 | 0.14 | -    | 2.13                                | 0.89                        | 0.46 | 1.98 | 1.38 | 4.71                            | 2.2                              | 0.4       | 0.2      |
| 1916-24 | Violet-Blue       | 92C    | -                               | -    | 0.15                   | -    | -    | 0.15                  | 0.30 | 0.07 | 0.07 | 0.74                                | 2.14                        | 0.17 | 3.46 | 1.95 | 7.73                            | 10.4                             | 4.1       | 0.3      |
| 1916-27 | Violet-Blue       | 96D    | -                               | -    | -                      | -    | -    | 0.51                  | 1.41 | 0.16 | 0.05 | 2.13                                | 1.26                        | 0.87 | 3.10 | 1.72 | 6.95                            | 3.3                              | 0.6       | 0.4      |
| Average |                   |        |                                 |      |                        |      |      |                       |      |      |      |                                     |                             |      |      |      |                                 | 5.0                              | 1.7       | 0.4      |



\*A1, cyanidin 3-(6"-malonyl)glucoside; A2, cyanidin 3-(3",6"-dimalonyl)glucoside; A3, cyanidin 3-(6"-malonyl)glucoside-3'-glucoside; A4, cyanidin 3-(3",6"-dimalonyl)glucoside-3'-glucoside; A5, delphinidin 3-(6"-malonyl)glucoside; A7, delphinidin 3,3'5'-triglucoside (preternatin C5); A8, delphinidin 3-(6"-malonyl)glucoside-3',5'-diglucoside (ternatin C5); A9, delphinidin 3-(3",6"-dimalonyl)glucoside-3',5'-diglucoside; A10, delphinidin 3-(6"-malonyl)glucoside-3'-glucoside. †C1, luteolin 7-(6"-malonyl)glucoside; C2, tricetin 7-(6"-malonyl)glucoside; F1, apigenin 7-(6"-malonyl)glucoside; F2, acacetin 7-(6"-malonyl)glucoside.

**table S3. Primer sets used in binary vector construction.**

| Set No. | Direction | Name                           | Sequence (5'-3')                                                         | Restriction enzyme cleavage sites in underlined | Target                   |
|---------|-----------|--------------------------------|--------------------------------------------------------------------------|-------------------------------------------------|--------------------------|
| Primers |           |                                |                                                                          |                                                 |                          |
| 1       | Fd        | HANS- <i>F3H</i> pro1k-Fd      | <u>CCAAGCTTGGCGCGCCGCGCCGCATT</u> <u>TAAATTTACAAAACCATGTGCAAGAATG</u>    | HindIII, AscI, NotI, SwaI                       | <i>CmF3Hp</i>            |
|         | Rv        | SNM- <i>F3H</i> pro-Rv         | <u>ACTAGTGCTAGCACGCGT</u> <u>TTTTATTTTTTCTTCACACACTTG</u>                | SpeI, NheI, MluI                                |                          |
| 2       | Fd        | SSS- <i>NO</i> Ster-Fd         | <u>GAGCTCACTAGTGTGACGATCGTTCAAACATTTGGCAATAAAG</u>                       | SacI, EcoICRI (Ecl136II), SpeI, SalI            | <i>NO</i> St             |
|         | Rv        | ESP- <i>NO</i> Ster-Rv         | <u>CGAATTCAGGCCTGTTTAAACGATCTAGTAACATAGATGACAC</u>                       | EcoRI, SrfI, PmeI                               |                          |
| 3       | Fd        | hFAStSw-pro <i>CmF3H</i> -Fd   | <u>AAGCTTGGCCGGCCTAGGCGCGCCAGGCCTATTTAAATTTACAAAACCATGTGCA</u><br>AGAATG | HindIII, FseI, AscI, StuI, SwaI                 | <i>CmF3Hp</i>            |
|         | Rv        | SNM- <i>F3H</i> pro-Rv         | <u>ACTAGTGCTAGCACGCGT</u> <u>TTTTATTTTTTCTTCACACACTTG</u>                |                                                 |                          |
| 4       | Fd        | SSS-ter <i>HSP</i> -Fd         | <u>GAGCTCACTAGTGTGACATATGAAGATGAAGATGAAAT</u>                            | EcoICRI, SacI, SpeI, SalI                       | <i>AtHSPt</i>            |
|         | Rv        | KESP-ter <i>HSP</i> -Rv        | GGTACCGGTCCGGAATTCGTTTAAACGCCCGGGCCTTATCTTTAATCATATTCCATA<br>GTCC        | KpnI, PmeI, SmaI, SrfI                          |                          |
| 5       | Fd        | <i>CmF3'H</i> _full_ORF_F      | ATGAACATTTTACCTTTCGTATTTTATG                                             |                                                 | <i>F3'H</i> ORF          |
|         | Rv        | <i>CmF3'H</i> _full_ORF_R      | TTAAATACTTTCATATACGTGGG                                                  |                                                 |                          |
| 6       | Fd        | <i>CmF3'H</i> _3'-Fd for dsRNA | CACCCCGAACTCATTCGTCATCCAC                                                |                                                 | <i>F3'H</i> RNAi trigger |
|         | Rv        | <i>CmF3'H</i> _3'-Rv for dsRNA | TCAATCCATACGCTTCTTCCATG                                                  |                                                 |                          |
| 7       | Fd        | ADH-3'5' <i>GT</i> -Fd         | CAAGAAAAATAAATGGAAAACAATAAGCATGTC                                        |                                                 | <i>Ct3'5'GT-5'</i>       |

|    |    |                           |                                          |         |                                                      |
|----|----|---------------------------|------------------------------------------|---------|------------------------------------------------------|
|    | Rv | Hind- <i>Ct3'5'GT</i> -Rv | <u>AAGCTT</u> GCGTTTTTAGCATCATTC         | HindIII |                                                      |
| 8  | Fd | XbaI- <i>ADH</i> -Fd      | <u>ACGCGT</u> TCTAGAGTCTATTTAACTCAGTATTC | XbaI    | <i>NtADH</i> -5'UT<br>R                              |
|    | Rv | <i>Ct3'5'GT-ADH</i> -Rv   | ATTGTTTTCCATTATTTTTCTTGATTTCCTTCAC       |         |                                                      |
| 9  | Fd | XbaI- <i>ADH</i> -Fd      | <u>ACGCGT</u> TCTAGAGTCTATTTAACTCAGTATTC | XbaI    | <i>NtADH</i> -5'UT<br>R fused<br><i>Ct3'5'GT</i> -5' |
|    | Rv | Hind- <i>Ct3'5'GT</i> -Rv | <u>AAGCTT</u> GCGTTTTTAGCATCATTC         | HindIII |                                                      |
| 10 | Fd | NheI- <i>ADH</i> -Fd2     | <u>GCTAGCGT</u> CTATTTAACTCAGTATTCAGAAAC | NheI    |                                                      |
|    | Rv | <i>Ct3'5'GT</i> -SacI-Rv  | <u>GAGCTC</u> TTAGCTAGAGGAAATCATTCCAC    | SalI    |                                                      |
